# Supplementary material for: Dramatic impact of future climate change on the genetic diversity and distribution of ecologically relevant Western Mediterranean Carex (Cyperaceae)
Source: PeerJ. 2022 May 31;10:e13464. doi: 10.7717/peerj.13464 (PMC9165605; doi:10.7717/peerj.13464)
Supplement: Supplemental Information 1 — Each tab displays the information for the studied populations of the extant taxa. Information about populations includes the country, location, longitude and latitude in decimal degrees, voucher and the source of the information in which has been included GBIF code or bibliographic reference in case that herbarium information was unknown. [file peerj-10-13464-s001.xlsx]

## Sheet: Read me
Table S1. Point localities employed in the distribution modeling analysis. Each tab displays the information for the studied populations of the extant taxa. Information about populations includes the country, location, longitude and latitude in decimal degrees, voucher and the source of the information in which has been included GBIF code or bibliographic reference in case that herbarium informat…

## Sheet: Table S1
Specie	Country	Location	Latitude	Longitude	Voucher	gbif ID/Herbarium code/Bibliographic reference
Carex reuteriana ssp. reuteriana	Spain		40.2186	-5.03472	Rainer,Karl s.n. [2011-04-23]	gbif ID: 1230540635
Carex reuteriana ssp. reuteriana	Portugal		41.0518	-7.98853	Henrique Nepomuceno Alves	gbif ID: 1248819819
Carex reuteriana ssp. reuteriana	Portugal		41.0495	-7.75059	Tiago Monteiro Henriques	gbif ID: 1248866198
Carex reuteriana ssp. reuteriana	Portugal		41.3252	-8.46228	Paulo Ventura Araújo, Maria Carvalho	gbif ID: 1075176028
Carex reuteriana ssp. reuteriana	Portugal		40.0619	-8.12058	Estevão Portela-Pereira	gbif ID: 1075226304
Carex reuteriana ssp. reuteriana	Portugal		39.8826	-8.23982	Estevão Portela-Pereira	gbif ID: 1075229428
Carex reuteriana ssp. reuteriana	Portugal		40.4162	-7.52665	Estevão Portela-Pereira	gbif ID: 1075232141
Carex reuteriana ssp. reuteriana	Spain		40.3388	-5.53124		gbif ID: 1142607774
Carex reuteriana ssp. reuteriana	Spain		40.2688	-5.51124		gbif ID: 1142608184
Carex reuteriana ssp. reuteriana	Spain		42.4488	-7.25131		gbif ID: 1142666950
Carex reuteriana ssp. reuteriana	Spain		40.8588	-3.83122		gbif ID: 1143000272
Carex reuteriana ssp. reuteriana	Spain		41.0588	-3.42121		gbif ID: 1143029388
Carex reuteriana ssp. reuteriana	Spain		40.9388	-3.73122		gbif ID: 1143031086
Carex reuteriana ssp. reuteriana	Spain		40.3788	-5.26124		gbif ID: 1143037136
Carex reuteriana ssp. reuteriana	Spain		40.1288	-5.40124		gbif ID: 1143037489
Carex reuteriana ssp. reuteriana	Spain		43.4888	-7.94135		gbif ID: 1143038668
Carex reuteriana ssp. reuteriana	Spain		43.3688	-7.83134		gbif ID: 1143038955
Carex reuteriana ssp. reuteriana	Portugal		39.7988	-8.09128		gbif ID: 1143104561
Carex reuteriana ssp. reuteriana	Spain		40.8988	-3.86122		gbif ID: 1143132849
Carex reuteriana ssp. reuteriana	Spain		40.8288	-3.91122		gbif ID: 1143147657
Carex reuteriana ssp. reuteriana	Spain		40.26	-5.47	J.C.Cristóbal	gbif ID: 318105966
Carex reuteriana ssp. reuteriana	Spain		41.0588	-3.06121		gbif ID: 217705483
Carex reuteriana ssp. reuteriana	Spain		39.9388	-5.87124		gbif ID: 217884579
Carex reuteriana ssp. reuteriana	Spain		41.9288	-6.53129		gbif ID: 217884819
Carex reuteriana ssp. reuteriana	Spain		42.9189	-5.63129		gbif ID: 217885737
Carex reuteriana ssp. reuteriana	Spain		40.9688	-3.30121		gbif ID: 217898529
Carex reuteriana ssp. reuteriana	Spain		43.47	-6.43	T.E. Díaz	gbif ID: 211621468
Carex reuteriana ssp. reuteriana	Portugal		40.2401	-7.88315	Paulo Silveira	gbif ID: 1075218717
Carex reuteriana ssp. reuteriana	Portugal		39.3339	-7.43361	Estevão Portela-Pereira	gbif ID: 1075228499
Carex reuteriana ssp. reuteriana	Portugal		40.5091	-7.76067	Alexandre Silva	gbif ID: 1248822191
Carex reuteriana ssp. reuteriana	Spain		42.3788	-7.18131		gbif ID: 1142666944
Carex reuteriana ssp. reuteriana	Spain		42.9989	-5.7613		gbif ID: 1142820670
Carex reuteriana ssp. reuteriana	Spain		42.8588	-6.0613		gbif ID: 1142820706
Carex reuteriana ssp. reuteriana	Spain		43.1688	-7.15133		gbif ID: 1143038943
Carex reuteriana ssp. reuteriana	Portugal		40.1988	-7.84128		gbif ID: 1143089983
Carex reuteriana ssp. reuteriana	Portugal		40.5688	-8.3913		gbif ID: 1143104566
Carex reuteriana ssp. reuteriana	Spain		40.8888	-3.87122		gbif ID: 1143132870
Carex reuteriana ssp. reuteriana	Portugal		39.9673	-7.65342	Rute Caraça	gbif ID: 1075189269
Carex reuteriana ssp. reuteriana	Portugal		40.2292	-7.06057	Estevão Portela-Pereira	gbif ID: 1075226919
Carex reuteriana ssp. reuteriana	Portugal		40.061	-8.00334	Estevão Portela-Pereira	gbif ID: 1075229089
Carex reuteriana ssp. reuteriana	Spain		40.3288	-5.39124		gbif ID: 1142607867
Carex reuteriana ssp. reuteriana	Spain		40.2288	-5.53124		gbif ID: 1142608479
Carex reuteriana ssp. reuteriana	Spain		42.1088	-8.29133		gbif ID: 1142666949
Carex reuteriana ssp. reuteriana	Spain		40.4088	-4.94123		gbif ID: 1143014165
Carex reuteriana ssp. reuteriana	Spain		40.9488	-3.70122		gbif ID: 1143014176
Carex reuteriana ssp. reuteriana	Spain		40.5188	-6.01125		gbif ID: 1143037345
Carex reuteriana ssp. reuteriana	Spain		43.4688	-7.75135		gbif ID: 1143050975
Carex reuteriana ssp. reuteriana	Spain		40.3688	-5.72125		gbif ID: 217884657
Carex reuteriana ssp. reuteriana	Spain		42.0188	-6.28129		gbif ID: 217884886
Carex reuteriana ssp. reuteriana	Spain		42.9489	-4.48127		gbif ID: 217888787
Carex reuteriana ssp. reuteriana	Spain		40.22	-5.78	G. Aragón & Col.	gbif ID: 30256573
Carex reuteriana ssp. reuteriana	Portugal		40.0587	-7.76887	Rute Caraça	gbif ID: 1075189241
Carex reuteriana ssp. reuteriana	Portugal		40.1392	-7.06313	Rute Caraça	gbif ID: 1075189264
Carex reuteriana ssp. reuteriana	Portugal		39.5194	-7.89479	Estevão Portela-Pereira	gbif ID: 1075231398
Carex reuteriana ssp. reuteriana	Spain		40.2788	-5.64124		gbif ID: 1142612404
Carex reuteriana ssp. reuteriana	Spain		41.2588	-3.54122		gbif ID: 1143036700
Carex reuteriana ssp. reuteriana	Spain		40.1288	-5.69124		gbif ID: 1143037326
Carex reuteriana ssp. reuteriana	Spain		43.3188	-7.96135		gbif ID: 1143048205
Carex reuteriana ssp. reuteriana	Spain		43.3988	-7.76134		gbif ID: 1143048213
Carex reuteriana ssp. reuteriana	Spain		40.9588	-3.77122		gbif ID: 1143131425
Carex reuteriana ssp. reuteriana	Spain		40.9588	-3.65122		gbif ID: 217884363
Carex reuteriana ssp. reuteriana	Spain		42.1388	-6.6813		gbif ID: 217884812
Carex reuteriana ssp. reuteriana	Spain		42.39	-6.87	J. Andrés	gbif ID: 895312146
Carex reuteriana ssp. reuteriana	Spain		40.2265	-6.9432	D. García & M. Gutiérrez	gbif ID: 910476095
Carex reuteriana ssp. reuteriana	Spain		42.13	-6.69	P. Bariego	gbif ID: 895360880
Carex reuteriana ssp. reuteriana	Portugal		40.4177	-7.64449	Paulo Ventura AraÃºjo, Maria Carvalho	gbif ID: 1075176009
Carex reuteriana ssp. reuteriana	Portugal		42.1352	-8.33448	Paulo Ventura AraÃºjo, Maria Carvalho	gbif ID: 1075176024
Carex reuteriana ssp. reuteriana	Portugal		41.9376	-6.88904	Carlos Aguiar	gbif ID: 1075223834
Carex reuteriana ssp. reuteriana	Portugal		40.1475	-7.64987	Estevão Portela-Pereira	gbif ID: 1075227603
Carex reuteriana ssp. reuteriana	Portugal		39.7916	-8.12403	Estevão Portela-Pereira	gbif ID: 1075229388
Carex reuteriana ssp. reuteriana	Portugal		39.5204	-8.01111	Estevão Portela-Pereira	gbif ID: 1075229479
Carex reuteriana ssp. reuteriana	Spain		40.3188	-5.58124		gbif ID: 1142608218
Carex reuteriana ssp. reuteriana	Spain		42.3888	-7.08131		gbif ID: 1142667842
Carex reuteriana ssp. reuteriana	Spain		40.8788	-3.77122		gbif ID: 1143014184
Carex reuteriana ssp. reuteriana	Spain		40.1988	-5.10123		gbif ID: 1143037152
Carex reuteriana ssp. reuteriana	Spain		40.1288	-5.44124		gbif ID: 1143037516
Carex reuteriana ssp. reuteriana	Spain		43.5488	-7.76135		gbif ID: 1143038670
Carex reuteriana ssp. reuteriana	Portugal		40.1888	-7.81128		gbif ID: 1143089847
Carex reuteriana ssp. reuteriana	Portugal		41.9353	-6.7685	David T. Holyoak	gbif ID: 1248875540
Carex reuteriana ssp. reuteriana	Spain		40.26	-5.9	R. González & J. A. Sánchez Rodríguez	gbif ID: 142914765
Carex reuteriana ssp. reuteriana	Spain		40.4288	-6.06125		gbif ID: 217884661
Carex reuteriana ssp. reuteriana	Spain		40.3888	-5.89125		gbif ID: 217884665
Carex reuteriana ssp. reuteriana	Spain		40.2288	-5.06123		gbif ID: 217884743
Carex reuteriana ssp. reuteriana	Spain		40.3188	-4.94123		gbif ID: 217884752
Carex reuteriana ssp. reuteriana	Spain		42.9389	-4.53127		gbif ID: 217888836
Carex reuteriana ssp. reuteriana	Portugal		39.4328	-8.36093	Estevão Portela-Pereira	gbif ID: 1075227848
Carex reuteriana ssp. reuteriana	Spain		40.3088	-5.61124		gbif ID: 1142607679
Carex reuteriana ssp. reuteriana	Spain		42.2988	-7.12131		gbif ID: 1142820652
Carex reuteriana ssp. reuteriana	Spain		43.4988	-7.75135		gbif ID: 1143038652
Carex reuteriana ssp. reuteriana	Spain		43.4188	-7.50134		gbif ID: 1143038949
Carex reuteriana ssp. reuteriana	Spain		40.8488	-3.83122		gbif ID: 1143147564
Carex reuteriana ssp. reuteriana	Portugal		40.419	-7.76233	Alexandre Silva	gbif ID: 1248822174
Carex reuteriana ssp. reuteriana	Spain		41.1488	-3.06121		gbif ID: 217884732
Carex reuteriana ssp. reuteriana	Spain		40.2288	-4.82123		gbif ID: 217884736
Carex reuteriana ssp. reuteriana	Spain		42.2088	-6.7613		gbif ID: 217884887
Carex reuteriana ssp. reuteriana	Spain		42.8088	-6.63131		gbif ID: 217888070
Carex reuteriana ssp. reuteriana	Spain		43.36	-6.15	C. Aedo	gbif ID: 30257425
Carex reuteriana ssp. reuteriana	Spain		40.15	-5.07	Luceño & Vargas	gbif ID: 30257787
Carex reuteriana ssp. reuteriana	Spain		43.52	-6.55	T.E. Díaz	gbif ID: 85274881
Carex reuteriana ssp. reuteriana	Spain		42.2493	-8.17712	R. Pino, J.J. Pino, J.L. Camaño, A. Pino, X.R. García & J. González	gbif ID: 932705546
Carex reuteriana ssp. reuteriana	Spain		42.2732	-8.35164	R. Pino	gbif ID: 932708505
Carex reuteriana ssp. reuteriana	Portugal		40.2375	-7.64808	Estevão Portela-Pereira	gbif ID: 1075227630
Carex reuteriana ssp. reuteriana	Portugal		40.4147	-7.40882	Estevão Portela-Pereira	gbif ID: 1075232049
Carex reuteriana ssp. reuteriana	Portugal		40.9617	-7.98991	Tiago Monteiro Henriques	gbif ID: 1248866197
Carex reuteriana ssp. reuteriana	Spain		40.3588	-5.26124		gbif ID: 1142598326
Carex reuteriana ssp. reuteriana	Spain		42.9788	-8.94136		gbif ID: 1142667881
Carex reuteriana ssp. reuteriana	Spain		40.9388	-3.71122		gbif ID: 1143018016
Carex reuteriana ssp. reuteriana	Portugal		40.1588	-7.86128		gbif ID: 1143089520
Carex reuteriana ssp. reuteriana	Spain		40.8788	-3.88122		gbif ID: 1143132846
Carex reuteriana ssp. reuteriana	Spain		40.8688	-3.89122		gbif ID: 217884442
Carex reuteriana ssp. reuteriana	Spain		43.0289	-4.53127		gbif ID: 217884640
Carex reuteriana ssp. reuteriana	Spain		40.8788	-4.01122		gbif ID: 217895544
Carex reuteriana ssp. reuteriana	Portugal		39.9464	-7.87028	Rainer,Karl s.n. [2011-04-17]	gbif ID: 698899855
Carex reuteriana ssp. reuteriana	Spain		42.91	-6.24	J. Andrés	gbif ID: 895312066
Carex reuteriana ssp. reuteriana	Spain		41.87	-6.52	P. Bariego	gbif ID: 895360894
Carex reuteriana ssp. reuteriana	Portugal		40.2389	-7.76562	Paulo Silveira	gbif ID: 1075218691
Carex reuteriana ssp. reuteriana	Portugal		40.152	-8.11942	Paulo Silveira	gbif ID: 1075218712
Carex reuteriana ssp. reuteriana	Portugal		40.8735	-8.2286	João D. Almeida	gbif ID: 1248776193
Carex reuteriana ssp. reuteriana	Spain		42.9088	-5.7613		gbif ID: 1142820689
Carex reuteriana ssp. reuteriana	Spain		39.8188	-4.64122		gbif ID: 1143036703
Carex reuteriana ssp. reuteriana	Spain		40.2088	-5.77124		gbif ID: 1143037342
Carex reuteriana ssp. reuteriana	Spain		40.4188	-6.14125		gbif ID: 1143037501
Carex reuteriana ssp. reuteriana	Spain		41.1288	-3.23121		gbif ID: 1143037556
Carex reuteriana ssp. reuteriana	Spain		43.3288	-7.95135		gbif ID: 1143038687
Carex reuteriana ssp. reuteriana	Spain		43.4288	-7.73134		gbif ID: 1143048184
Carex reuteriana ssp. reuteriana	Spain		40.8988	-3.89122		gbif ID: 1143147033
Carex reuteriana ssp. reuteriana	Spain		40.8988	-3.88122		gbif ID: 1143147370
Carex reuteriana ssp. reuteriana	Spain		40.8988	-3.87122		gbif ID: 1143149435
Carex reuteriana ssp. reuteriana	Spain		39.5888	-5.50123		gbif ID: 217884575
Carex reuteriana ssp. reuteriana	Spain		42.9389	-4.41127		gbif ID: 217884641
Carex reuteriana ssp. reuteriana	Spain		42.8088	-7.11132		gbif ID: 217886327
Carex reuteriana ssp. reuteriana	Portugal		41.8665	-8.69876	Paulo Ventura AraÃºjo, Maria Carvalho	gbif ID: 1075176023
Carex reuteriana ssp. reuteriana	Portugal		39.8786	-7.7721	Estevão Portela-Pereira	gbif ID: 1075229213
Carex reuteriana ssp. reuteriana	Portugal		39.7907	-8.00725	Estevão Portela-Pereira	gbif ID: 1075229365
Carex reuteriana ssp. reuteriana	Spain		40.8888	-3.88122		gbif ID: 1143132856
Carex reuteriana ssp. reuteriana	Portugal		41.0528	-8.10751	Henrique Nepomuceno Alves	gbif ID: 1248819831
Carex reuteriana ssp. reuteriana	Portugal		39.9698	-7.88756	David T. Holyoak	gbif ID: 1248875531
Carex reuteriana ssp. reuteriana	Spain		40.3188	-5.06123		gbif ID: 217884756
Carex reuteriana ssp. reuteriana	Spain		40.3088	-5.63124		gbif ID: 1142612660
Carex reuteriana ssp. reuteriana	Spain		42.1388	-8.20133		gbif ID: 1142666974
Carex reuteriana ssp. reuteriana	Spain		41.2388	-3.44122		gbif ID: 1143036704
Carex reuteriana ssp. reuteriana	Spain		43.4688	-7.55134		gbif ID: 1143038662
Carex reuteriana ssp. reuteriana	Portugal		41.7588	-8.15132		gbif ID: 1143103847
Carex reuteriana ssp. reuteriana	Portugal		40.8726	-8.10994	João D. Almeida	gbif ID: 1248851972
Carex reuteriana ssp. reuteriana	Spain		41.1188	-3.54122		gbif ID: 217884364
Carex reuteriana ssp. reuteriana	Spain		41.7488	-6.53129		gbif ID: 217884837
Carex reuteriana ssp. reuteriana	Portugal		39.7885	-7.7737	Estevão Portela-Pereira	gbif ID: 1075230010
Carex reuteriana ssp. reuteriana	Portugal		39.4293	-7.89621	Estevão Portela-Pereira	gbif ID: 1075231493
Carex reuteriana ssp. reuteriana	Spain		43.4588	-7.75134		gbif ID: 1143038927
Carex reuteriana ssp. reuteriana	Spain		40.9088	-3.88122		gbif ID: 1143129638
Carex reuteriana ssp. reuteriana	Spain		41.0088	-3.66122		gbif ID: 1143129657
Carex reuteriana ssp. reuteriana	Spain		41.0088	-3.67122		gbif ID: 1143147590
Carex reuteriana ssp. reuteriana	Spain		41.8388	-6.53129		gbif ID: 217883888
Carex reuteriana ssp. reuteriana	Spain		42.0088	-5.84128		gbif ID: 217884824
Carex reuteriana ssp. reuteriana	Portugal		41.7723	-7.97729	Paulo Ventura AraÃºjo, Maria Carvalho	gbif ID: 1075176020
Carex reuteriana ssp. reuteriana	Portugal		39.9734	-8.35592	Rute Caraça	gbif ID: 1075189257
Carex reuteriana ssp. reuteriana	Spain		40.3788	-5.72125		gbif ID: 1142608237
Carex reuteriana ssp. reuteriana	Spain		41.9488	-7.97132		gbif ID: 1142827803
Carex reuteriana ssp. reuteriana	Spain		40.1488	-5.35123		gbif ID: 1143037125
Carex reuteriana ssp. reuteriana	Spain		43.4088	-7.59134		gbif ID: 1143038959
Carex reuteriana ssp. reuteriana	Spain		41.2388	-3.06121		gbif ID: 1143078373
Carex reuteriana ssp. reuteriana	Spain		40.8388	-3.89122		gbif ID: 1143129672
Carex reuteriana ssp. reuteriana	Spain		40.8988	-3.75122		gbif ID: 1143153189
Carex reuteriana ssp. reuteriana	Spain		41.1488	-3.54122		gbif ID: 217884365
Carex reuteriana ssp. reuteriana	Spain		41.9188	-6.05128		gbif ID: 217884825
Carex reuteriana ssp. reuteriana	Spain		42.2488	-8.17133		gbif ID: 217891959
Carex reuteriana ssp. reuteriana	Spain		42.91	-9.11	R. I. Louzãn	gbif ID: 142915699
Carex reuteriana ssp. reuteriana	Portugal		41.8476	-6.892	Carlos Aguiar	gbif ID: 1248826438
Carex reuteriana ssp. reuteriana	Spain		41.02	-3.57	J. Calvo	gbif ID: 997596684
Carex reuteriana ssp. reuteriana	Portugal		41.7733	-8.0976	Paulo Ventura Araújo, Maria Carvalho	gbif ID: 1075176006
Carex reuteriana ssp. reuteriana	Portugal		41.7712	-7.857	Paulo Ventura Araújo, Maria Carvalho	gbif ID: 1075176034
Carex reuteriana ssp. reuteriana	Portugal		40.1445	-7.41515	Rute CaraÃ§a	gbif ID: 1075189242
Carex reuteriana ssp. reuteriana	Portugal		40.056	-7.53444	Estevão Portela-Pereira	gbif ID: 1075227470
Carex reuteriana ssp. reuteriana	Portugal		39.8817	-8.12288	Estevão Portela-Pereira	gbif ID: 1075229415
Carex reuteriana ssp. reuteriana	Portugal		40.3262	-7.52861	David T. Holyoak	gbif ID: 1248875555
Carex reuteriana ssp. reuteriana	Spain		40.2588	-5.51124		gbif ID: 1142612446
Carex reuteriana ssp. reuteriana	Spain		41.8588	-8.10132		gbif ID: 1142804029
Carex reuteriana ssp. reuteriana	Spain		40.4788	-6.11125		gbif ID: 1143037358
Carex reuteriana ssp. reuteriana	Spain		43.4788	-7.62134		gbif ID: 1143050980
Carex reuteriana ssp. reuteriana	Spain		40.8388	-3.88122		gbif ID: 1143147550
Carex reuteriana ssp. reuteriana	Spain		40.9188	-3.88122		gbif ID: 1143154556
Carex reuteriana ssp. reuteriana	Spain		40.8688	-3.77122		gbif ID: 217884362
Carex reuteriana ssp. reuteriana	Spain		42.9188	-6.37131		gbif ID: 217889420
Carex reuteriana ssp. reuteriana	Spain		42.17	-6.78	P. Bariego	gbif ID: 895360906
Carex reuteriana ssp. reuteriana	Portugal		42.1344	-8.21349	Henrique Nepomuceno Alves	gbif ID: 1248819828
Carex reuteriana ssp. reuteriana	Portugal		41.0507	-7.86956	Tiago Monteiro Henriques	gbif ID: 1248866168
Carex reuteriana ssp. reuteriana	Spain		39.6688	-4.55121		gbif ID: 1143036658
Carex reuteriana ssp. reuteriana	Spain		41.0488	-3.82122		gbif ID: 1143036701
Carex reuteriana ssp. reuteriana	Spain		43.4988	-7.67134		gbif ID: 1143038939
Carex reuteriana ssp. reuteriana	Spain		43.4388	-7.70134		gbif ID: 1143038970
Carex reuteriana ssp. reuteriana	Spain		41.1488	-3.18121		gbif ID: 1143078393
Carex reuteriana ssp. reuteriana	Portugal		41.7888	-8.13132		gbif ID: 1143101995
Carex reuteriana ssp. reuteriana	Spain		40.3388	-5.52124		gbif ID: 1142608564
Carex reuteriana ssp. reuteriana	Spain		43.21	-6.97	C. Aedo, J. J. Aldasoro & F. Muñoz Garmendia	gbif ID: 142915352
Carex reuteriana ssp. reuteriana	Spain		40.3088	-5.53124		gbif ID: 217884754
Carex reuteriana ssp. reuteriana	Spain		42.5688	-7.11131		gbif ID: 217889728
Carex reuteriana ssp. reuteriana	Portugal		40.8706	-7.87263	Tiago Monteiro Henriques	gbif ID: 1248866229
Carex reuteriana ssp. reuteriana	Spain		40.2988	-5.60124		gbif ID: 1142612103
Carex reuteriana ssp. reuteriana	Spain		42.4488	-7.72132		gbif ID: 1142666916
Carex reuteriana ssp. reuteriana	Spain		43.4888	-7.61134		gbif ID: 1143048218
Carex reuteriana ssp. reuteriana	Spain		42.9188	-6.49131		gbif ID: 217884402
Carex reuteriana ssp. reuteriana	Spain		42.8288	-5.63129		gbif ID: 217885738
Carex reuteriana ssp. reuteriana	Spain		42.11	-6.68	P. Bariego	gbif ID: 895360865
Carex reuteriana ssp. reuteriana	Portugal		41.5911	-7.86018	Paulo Ventura Araújo, Maria Carvalho	gbif ID: 1075176018
Carex reuteriana ssp. reuteriana	Portugal		41.4997	-7.74197	Paulo Ventura Araújo, Maria Carvalho	gbif ID: 1075176036
Carex reuteriana ssp. reuteriana	Portugal		39.8808	-8.00595	Estevão Portela-Pereira	gbif ID: 1075228921
Carex reuteriana ssp. reuteriana	Portugal		39.8797	-7.88902	Estevão Portela-Pereira	gbif ID: 1075229466
Carex reuteriana ssp. reuteriana	Portugal		40.15	-7.88463	Paulo Silveira	gbif ID: 1075218707
Carex reuteriana ssp. reuteriana	Portugal		40.0628	-8.23782	Estevão Portela-Pereira	gbif ID: 1075230959
Carex reuteriana ssp. reuteriana	Portugal		39.8833	-8.35676	Estevão Portela-Pereira	gbif ID: 1075232797
Carex reuteriana ssp. reuteriana	Spain		40.3988	-5.59124		gbif ID: 1142598332
Carex reuteriana ssp. reuteriana	Spain		42.1288	-8.23133		gbif ID: 1142666939
Carex reuteriana ssp. reuteriana	Spain		40.1088	-5.81124		gbif ID: 1143037322
Carex reuteriana ssp. reuteriana	Spain		40.1188	-5.70124		gbif ID: 1143037382
Carex reuteriana ssp. reuteriana	Spain		43.3888	-7.60134		gbif ID: 1143038656
Carex reuteriana ssp. reuteriana	Spain		43.4088	-6.94133		gbif ID: 1143050971
Carex reuteriana ssp. reuteriana	Spain		40.1188	-5.88124		gbif ID: 217884570
Carex reuteriana ssp. reuteriana	Spain		40.1288	-5.63124		gbif ID: 217884577
Carex reuteriana ssp. reuteriana	Spain		40.29	-5.71	R. Ãlvarez, F. Bajo & al.	gbif ID: 30257723
Carex reuteriana ssp. reuteriana	Spain		40.3018	-5.76524	D. García, M. Gutiérrez & F. M. Vázquez	gbif ID: 910474978
Carex reuteriana ssp. reuteriana	Spain		42.4088	-7.01131		gbif ID: 1142666930
Carex reuteriana ssp. reuteriana	Spain		42.2288	-8.45133		gbif ID: 1142821597
Carex reuteriana ssp. reuteriana	Spain		42.5688	-7.23132		gbif ID: 1142827813
Carex reuteriana ssp. reuteriana	Spain		40.7288	-4.20122		gbif ID: 1143036691
Carex reuteriana ssp. reuteriana	Spain		43.5188	-7.75135		gbif ID: 1143038640
Carex reuteriana ssp. reuteriana	Portugal		40.1288	-8.11128		gbif ID: 1143090614
Carex reuteriana ssp. reuteriana	Portugal		40.3988	-7.63128		gbif ID: 1143104553
Carex reuteriana ssp. reuteriana	Spain		40.3088	-6.71126		gbif ID: 217884672
Carex reuteriana ssp. reuteriana	Spain		42.11	-6.7	P. Bariego & A. Gallego Carricajo	gbif ID: 895359967
Carex reuteriana ssp. reuteriana	Portugal		41.1451	-8.46376	Paulo Ventura Araújo, Maria Carvalho	gbif ID: 1075176063
Carex reuteriana ssp. reuteriana	Portugal		39.9727	-8.23882	Estevão Portela-Pereira	gbif ID: 1075230879
Carex reuteriana ssp. reuteriana	Spain		40.2988	-5.67124		gbif ID: 1142608457
Carex reuteriana ssp. reuteriana	Spain		40.2488	-5.87125		gbif ID: 1143037327
Carex reuteriana ssp. reuteriana	Spain		40.1088	-5.54124		gbif ID: 217884576
Carex reuteriana ssp. reuteriana	Spain		40.1288	-5.88124		gbif ID: 217884586
Carex reuteriana ssp. reuteriana	Spain		40.3088	-5.66124		gbif ID: 1142607568
Carex reuteriana ssp. reuteriana	Spain		42.2788	-7.13131		gbif ID: 1142666948
Carex reuteriana ssp. reuteriana	Spain		40.8688	-4.01122		gbif ID: 1142791117
Carex reuteriana ssp. reuteriana	Spain		42.4088	-8.45134		gbif ID: 1142827811
Carex reuteriana ssp. reuteriana	Spain		40.45	-6.15	M. Ladero & M. A. Luengo	gbif ID: 142913832
Carex reuteriana ssp. reuteriana	Spain		42.37	-8.7	X. R. García Martínez	gbif ID: 142914580
Carex reuteriana ssp. reuteriana	Spain		40.5688	-5.89125		gbif ID: 217884664
Carex reuteriana ssp. reuteriana	Spain		40.3088	-5.41124		gbif ID: 217884735
Carex reuteriana ssp. reuteriana	Spain		40.3188	-4.71123		gbif ID: 217884753
Carex reuteriana ssp. reuteriana	Spain		40.3988	-6.58126		gbif ID: 217895412
Carex reuteriana ssp. reuteriana	Spain		41.9988	-7.96132		gbif ID: 1142689904
Carex reuteriana ssp. reuteriana	Spain		43.4488	-7.78135		gbif ID: 1143036729
Carex reuteriana ssp. reuteriana	Spain		43.2488	-7.96134		gbif ID: 1143038855
Carex reuteriana ssp. reuteriana	Spain		43.5188	-7.71135		gbif ID: 1143038974
Carex reuteriana ssp. reuteriana	Portugal		40.1688	-7.92128		gbif ID: 1143089825
Carex reuteriana ssp. reuteriana	Portugal		42.0988	-8.30133		gbif ID: 1143092450
Carex reuteriana ssp. reuteriana	Portugal		40.5388	-8.3613		gbif ID: 1143104543
Carex reuteriana ssp. reuteriana	Spain		40.29	-5.74	M. Luceño & P. Vargas	gbif ID: 142915329
Carex reuteriana ssp. reuteriana	Spain		42.4488	-6.81131		gbif ID: 217886763
Carex reuteriana ssp. reuteriana	Spain		39.46	-4.86	L.Serra	gbif ID: 318105586
Carex reuteriana ssp. reuteriana	Portugal		40.0599	-7.8861	Estevão Portela-Pereira	gbif ID: 1075229043
Carex reuteriana ssp. reuteriana	Spain		40.2988	-5.68124		gbif ID: 1142607614
Carex reuteriana ssp. reuteriana	Spain		40.2788	-5.65124		gbif ID: 1142608070
Carex reuteriana ssp. reuteriana	Spain		40.2088	-5.54124		gbif ID: 1142609352
Carex reuteriana ssp. reuteriana	Spain		42.3888	-7.20131		gbif ID: 1142666942
Carex reuteriana ssp. reuteriana	Spain		41.9488	-8.10132		gbif ID: 1142804050
Carex reuteriana ssp. reuteriana	Spain		43.3988	-7.78134		gbif ID: 1143038934
Carex reuteriana ssp. reuteriana	Spain		43.4288	-7.70134		gbif ID: 1143038979
Carex reuteriana ssp. reuteriana	Spain		43.3488	-7.79134		gbif ID: 1143050978
Carex reuteriana ssp. reuteriana	Spain		40.8388	-3.95122		gbif ID: 1143139124
Carex reuteriana ssp. reuteriana	Spain		40.0288	-5.75124		gbif ID: 217884607
Carex reuteriana ssp. reuteriana	Spain		40.2188	-5.53124		gbif ID: 217884734
Carex reuteriana ssp. reuteriana	Spain		40.2488	-4.84123		gbif ID: 217884738
Carex reuteriana ssp. reuteriana	Spain		42.0288	-6.7713		gbif ID: 217895624
Carex reuteriana ssp. reuteriana	Spain		42.39	-6.75	J. Andrés & R. Carbã	gbif ID: 895312116
Carex reuteriana ssp. reuteriana	Spain		42.11	-6.69	P. Bariego	gbif ID: 895360827
Carex reuteriana ssp. reuteriana	Portugal		39.8758	-7.53828	Estevão Portela-Pereira	gbif ID: 1075229992
Carex reuteriana ssp. reuteriana	Spain		39.6888	-4.69121		gbif ID: 1143036698
Carex reuteriana ssp. reuteriana	Spain		43.5488	-7.73135		gbif ID: 1143038977
Carex reuteriana ssp. reuteriana	Spain		41.7388	-6.17128		gbif ID: 217884838
Carex reuteriana ssp. reuteriana	Portugal		40.0888	-7.85128		gbif ID: 1143111271
Carex reuteriana ssp. reuteriana	Spain		42.376	-8.69	X.R. García Martínez	gbif ID: 204422461
Carex reuteriana ssp. reuteriana	Spain		40.3088	-5.29124		gbif ID: 217884733
Carex reuteriana ssp. reuteriana	Spain		39.8488	-5.86124		gbif ID: 217890793
Carex reuteriana ssp. reuteriana	Portugal		40.9636	-8.22755	Tiago Monteiro Henriques	gbif ID: 1248866184
Carex reuteriana ssp. reuteriana	Spain		42.19	-6.36	P. Bariego & A. Gallego Carricajo	gbif ID: 895360887
Carex reuteriana ssp. reuteriana	Spain		43.44	-7	C. Aedo, J. J. Aldasoro & F. Muñoz Garmendia	gbif ID: 142915353
Carex reuteriana ssp. reuteriana	Portugal		39.4223	-7.31546	Rute Caraça	gbif ID: 1075189238
Carex reuteriana ssp. reuteriana	Portugal		39.9686	-7.77049	Estevão Portela-Pereira	gbif ID: 1075229270
Carex reuteriana ssp. reuteriana	Spain		40.3388	-5.76125		gbif ID: 1142608004
Carex reuteriana ssp. reuteriana	Spain		40.3488	-5.52124		gbif ID: 1142608527
Carex reuteriana ssp. reuteriana	Spain		41.8488	-8.10132		gbif ID: 1142678005
Carex reuteriana ssp. reuteriana	Spain		40.7688	-3.90122		gbif ID: 1143037507
Carex reuteriana ssp. reuteriana	Spain		43.4188	-7.45134		gbif ID: 1143048725
Carex reuteriana ssp. reuteriana	Spain		43.3088	-7.75134		gbif ID: 1143050960
Carex reuteriana ssp. reuteriana	Spain		40.4088	-6.09125		gbif ID: 217884580
Carex reuteriana ssp. reuteriana	Spain		40.4788	-5.89125		gbif ID: 217884659
Carex reuteriana ssp. reuteriana	Spain		40.2588	-5.01123		gbif ID: 217884737
Carex reuteriana ssp. reuteriana	Spain		40.9088	-3.98122		gbif ID: 217895545
Carex reuteriana ssp. reuteriana	Spain		40.11	-5.8	G. Aragón & Col.	gbif ID: 30256581
Carex reuteriana ssp. reuteriana	Portugal	Beira Litoral, Coimbra, Lousã	40.1	-8.234	M. Escudero et al.	UPOS herbarium 7374
Carex reuteriana ssp. reuteriana	Portugal	Tras os Montes, Lamego, Bigorne, Petrarouca	41.027	-7.879	M. Escudero et al.	UPOS herbarium 7373
Carex reuteriana ssp. reuteriana	Spain	Ávila, Sierra de Gredos, Las Chorreras del Tormes	40.339	-5.157	J.M.Marín	UPOS herbarium 1004
Carex reuteriana ssp. reuteriana	Spain	Ávila, close to Barco de Ávila	40.357	-5.528	J.M.Marín, M. Luceño et al.	UPOS herbarium 975
Carex reuteriana ssp. reuteriana	Spain	Ávila, Sierra de Gredos, Valey of the Convents	40.275	-5.078	J.M.Marín	UPOS herbarium 1002
Carex reuteriana ssp. reuteriana	Spain	Ávila, Sierra de Gredos, Garganta de la Covacha, Puerto del Peón	40.294	-5.181	J.M.Marín	UPOS herbarium 1675
Carex reuteriana ssp. reuteriana	Spain	Ávila, Gredos Platform	40.237	-5.32	P.Jiménez-Mejías, I. Pulgar & A. Avilés	UPOS herbarium 1675
Carex reuteriana ssp. reuteriana	Spain	Cáceres, Valley of Jerte	40.218	-5.752	P.Jiménez-Mejías & I. Pulgar, 57PJM07	UPOS herbarium 6957
Carex reuteriana ssp. reuteriana	Spain	Cáceres, Ibor river	39.621	-5.444	P. Jiménez-Mejías et al., 24PJM13	UPOS herbarium 5449
Carex reuteriana ssp. reuteriana	Spain	Cáceres, Ex102 road	39.478	-5.13	P.Jiménez-Mejías et al. 26PJM13	UPOS herbarium 5450
Carex reuteriana ssp. reuteriana	Spain	Toledo, Navalucillos	39.64	-4.666	P.Jiménez-Mejías et al.	UPOS herbarium 5479
Carex reuteriana ssp. reuteriana	Spain	Zamora, Sanabria Lake	42.12	-6.72	S,Martín-Bravo et al.	UPOS herbarium
Carex reuteriana ssp. reuteriana	Spain	Madrid, Rascafría, Perdón bridge, Lozoya river	40.887	-3.886		UPOS herbarium
Carex reuteriana ssp. reuteriana	Spain	Madrid, Navafría port from Lozoya, Sierra de Guadarrama	40.984	-3.817	E.Maguilla & M. Luceño, 29EMS13	UPOS herbarium 5130
Carex reuteriana ssp. reuteriana	Spain	Segovia, Valsaín pinewoods, Boca del Asno, Eresma river	40.864	-4.029		UPOS herbarium
Carex reuteriana ssp. reuteriana	Spain	León, Truébano de Babia, Luna river	42.946	-6.012	P.Jiménez-Mejías et al.	UPOS herbarium 2117
Carex reuteriana ssp. reuteriana	Spain	Ávila, Sierra de Gredos, Garganta de la Covacha, senda del Puerto del Peón	40.2944	-5.18056	J. M. Marín	UPOS herbarium 1675
Carex reuteriana ssp. reuteriana	Spain	Zamora, Sierra Segundera	42.0855	-6.95062	E.F.Galiano, E. Domínguez, S.Talavera & B. Valdés	SEV herbarium 244763
Carex reuteriana ssp. reuteriana	Spain	Ávila, Sierra de Béjar, between Becedas and Barco de Ávila. Puerto del Tremedal	40.387	-5.61693	E.F.Galiano, S. Silvestre, S. Talavera & B. Valdés	SEV herbarium 276075
Carex reuteriana ssp. reuteriana	Spain	Ávila, Pelayo river, between Arenas S. Pedro and Poyales del Hoyo	40.2015	-5.11084	D.S.Mata. P. Cantó & S. Laorga	SEV herbarium 10731
Carex reuteriana ssp. reuteriana	Spain	Coruña, El Sar-Santiago de Compostela	42.8712	-8.42348	E.F. Galiano	SEV herbarium 6942
Carex reuteriana ssp. mauritanica	Spain		37.72	-6.16	Guzmán, Luceño & Vargas	gbif ID: 1234388640
Carex reuteriana ssp. mauritanica	Spain		37.6587	-6.52121		gbif ID: 1143077253
Carex reuteriana ssp. mauritanica	Spain		37.8787	-6.67122		gbif ID: 1143077741
Carex reuteriana ssp. mauritanica	Spain		36.527	-5.586	A. Asensi, B. Díez & J. Cuenca	gbif ID: 199466564
Carex reuteriana ssp. mauritanica	Spain		37.7787	-6.82122		gbif ID: 1143041972
Carex reuteriana ssp. mauritanica	Spain		37.4687	-6.46121		gbif ID: 1143051283
Carex reuteriana ssp. mauritanica	Spain		36.8287	-4.50116		gbif ID: 1142660063
Carex reuteriana ssp. mauritanica	Spain		37.8987	-6.75122		gbif ID: 1143041915
Carex reuteriana ssp. mauritanica	Spain		36.524	-5.273	O. Gavira	gbif ID: 199467034
Carex reuteriana ssp. mauritanica	Spain		37.6287	-6.58121		gbif ID: 1143051323
Carex reuteriana ssp. mauritanica	Spain		36.501	-5.518	J. Cuenca	gbif ID: 199466563
Carex reuteriana ssp. mauritanica	Spain		37.579	-6.288	B. Cabezudo, A. V. Pérez-Latorre & P. Navas	gbif ID: 199467022
Carex reuteriana ssp. mauritanica	Spain		36.1378	-5.51139		gbif ID: 232663269
Carex reuteriana ssp. mauritanica	Spain		37.6887	-6.52121		gbif ID: 1143077208
Carex reuteriana ssp. mauritanica	Spain		38.1288	-4.10118		gbif ID: 1143077316
Carex reuteriana ssp. mauritanica	Spain		37.72	-6.17	Guzmán & al.	gbif ID: 30256548
Carex reuteriana ssp. mauritanica	Spain		36.5524	-5.61889		gbif ID: 232663399
Carex reuteriana ssp. mauritanica	Spain		37.6987	-6.47121		gbif ID: 1143077224
Carex reuteriana ssp. mauritanica	Spain		38.3913	-3.37271		gbif ID: 232663025
Carex reuteriana ssp. mauritanica	Spain		37.531	-6.188	B. Cabezudo, A.V. Pérez-Latorre & P. Navas	gbif ID: 199467013
Carex reuteriana ssp. mauritanica	Spain		37.563	-6.402	B. Cabezudo, A. V. Pérez-Latorre, P. Navas & Y. Gil	gbif ID: 199467023
Carex reuteriana ssp. mauritanica	Spain		38.1488	-3.54117		gbif ID: 1143077281
Carex reuteriana ssp. mauritanica	Spain		37.8787	-6.56122		gbif ID: 1143077441
Carex reuteriana ssp. mauritanica	Spain		36.4926	-5.4283		gbif ID: 232663355
Carex reuteriana ssp. mauritanica	Spain		36.2781	-5.66912		gbif ID: 232663402
Carex reuteriana ssp. mauritanica	Spain		36.1379	-5.51135		gbif ID: 232663939
Carex reuteriana ssp. mauritanica	Spain		36.737	-5.469	A. Aparicio & J. G. Rowe	gbif ID: 199466728
Carex reuteriana ssp. mauritanica	Spain		36.1478	-5.48878		gbif ID: 232663267
Carex reuteriana ssp. mauritanica	Spain		37.5087	-6.2312		gbif ID: 1143077269
Carex reuteriana ssp. mauritanica	Spain		37.5887	-6.83122		gbif ID: 1143077207
Carex reuteriana ssp. mauritanica	Spain		37.3787	-6.73121		gbif ID: 1143077219
Carex reuteriana ssp. mauritanica	Spain		37.6887	-5.5512		gbif ID: 1143077236
Carex reuteriana ssp. mauritanica	Spain		37.7087	-6.30121		gbif ID: 1143049466
Carex reuteriana ssp. mauritanica	Spain		37.705	-6.306	B. Cabezudo, A. V. Pérez-Latorre, D. Navas, P. Navas & Y. Gil	gbif ID: 199467021
Carex reuteriana ssp. mauritanica	Spain		36.2285	-5.66507		gbif ID: 232663396
Carex reuteriana ssp. mauritanica	Spain		37.532	-6.222	D. Navas, P. Navas & Y. Gil	gbif ID: 199467080
Carex reuteriana ssp. mauritanica	Spain		37.8087	-6.74122		gbif ID: 1143077420
Carex reuteriana ssp. mauritanica	Spain		36.1927	-5.53916		gbif ID: 232663271
Carex reuteriana ssp. mauritanica	Spain		37.9087	-6.77122		gbif ID: 1143049470
Carex reuteriana ssp. mauritanica	Spain		36.51	-5.518	A. Asensi, B. Díez & J. Cuenca	gbif ID: 199466562
Carex reuteriana ssp. mauritanica	Spain		36.6187	-5.40118		gbif ID: 217884183
Carex reuteriana ssp. mauritanica	Spain		36.5187	-5.62118		gbif ID: 217884187
Carex reuteriana ssp. mauritanica	Spain		36.1587	-5.61117		gbif ID: 217884182
Carex reuteriana ssp. mauritanica	Spain		36.0687	-5.50117		gbif ID: 217884184
Carex reuteriana ssp. mauritanica	Spain		37.7187	-6.70122		gbif ID: 1142670583
Carex reuteriana ssp. mauritanica	Spain		37.9687	-6.67122		gbif ID: 217884282
Carex reuteriana ssp. mauritanica	Spain		37.9687	-6.78122		gbif ID: 217884263
Carex reuteriana ssp. mauritanica	Algeria		34.7453	-1.48278	Warion, A. (Coll. G)	gbif ID: 1144638152
Carex reuteriana ssp. mauritanica	Spain		37.6987	-5.33119		gbif ID: 217884316
Carex reuteriana ssp. mauritanica	Spain		36.769	-5.213	M. Luceño & P. Vargas	gbif ID: 895312117
Carex reuteriana ssp. mauritanica	Spain		36.5678	-4.77485	Y. Gil, P. Navas, A. Pérez & D. Navas	gbif ID: 199467053
Carex reuteriana ssp. mauritanica	Spain		36.732	-5.234	D. Montilla	gbif ID: 199466884
Carex reuteriana ssp. mauritanica	Spain		36.792	-4.9	O. Gavira & F. Soriguer	gbif ID: 415616289
Carex reuteriana ssp. mauritanica	Spain		37.831	-6.733	E. Sánchez Gullón	gbif ID: 199467064
Carex reuteriana ssp. mauritanica	Spain		37.9187	-7.19123		gbif ID: 1143077210
Carex reuteriana ssp. mauritanica	Spain		36.8687	-4.47116		gbif ID: 1142659594
Carex reuteriana ssp. mauritanica	Spain		36.5173	-5.04067	B. Cabezudo, A. V. Pérez-Latorre & O. Gavira	gbif ID: 415616231
Carex reuteriana ssp. mauritanica	Spain		36.4777	-5.14505	O. Gavira	gbif ID: 1099345255
Carex reuteriana ssp. mauritanica	Spain		36.8487	-4.52116		gbif ID: 1142659785
Carex reuteriana ssp. mauritanica	Spain		36.711	-4.909	O. Gavira & F. Soriguer	gbif ID: 415616286
Carex reuteriana ssp. mauritanica	Spain		36.7087	-4.90117		gbif ID: 1143067651
Carex reuteriana ssp. mauritanica	Spain		36.8387	-4.89117		gbif ID: 1143070153
Carex reuteriana ssp. mauritanica	Spain		36.879	-4.476	A. V. Pérez Latorre, B. Cabezudo, G. Caballero & F. Soriguer	gbif ID: 199467380
Carex reuteriana ssp. mauritanica	Spain		36.574	-5.006	A. V. Pérez Latorre, F. Soriguer & J. García-Sánchez	gbif ID: 1099344273
Carex reuteriana ssp. mauritanica	Morocco	Tanger, Rif, Oued Laou	35.144	-5.299	A. J. Chaparro et al.	UPOS herbarium 1637
Carex reuteriana ssp. mauritanica	Morocco	Tanger, Rif, Oued Loukos	35.031	-5.442	A. J. Chaparro et al.	UPOS herbarium 1630
Carex reuteriana ssp. mauritanica	Spain	Cádiz, Alcornocales Natural Park	36.546	-5.594	P. Jiménez-Mejías & I. Pulgar	UPOS herbarium
Carex reuteriana ssp. mauritanica	Spain	Cádiz, Alcornocales Natural Park, Boyar farmhouse	36.76	-5.382	A. Aparicio	UPOS herbarium 927
Carex reuteriana ssp. mauritanica	Spain	Cádiz, El Gastor, Guadalete river	36.884	-5.449	P. Jiménez-Mejías	UPOS herbarium 7371
Carex reuteriana ssp. mauritanica	Spain	Jaén, Despeñaperros	38.375	-3.308	P. Jiménez-Mejías & L. Reina	UPOS herbarium
Carex reuteriana ssp. mauritanica	Spain	Jaén, Despeñaperros, A-4 to Aldeaquemada, Despeñaperros river	38.372	-3.509	S. Martín-Bravo, 21SMB16	UPOS herbarium 8749
Carex reuteriana ssp. mauritanica	Spain	Sevilla, El Ronquillo, Rivera de Huelva	37.669	-6.168	P. Jiménez-Mejías	UPOS herbarium 7372
Carex reuteriana ssp. mauritanica	Spain	Sevilla, El Ronquillo, Rivera de Huelva, ctra N-630 under A-66 bridge	37.672	-6.172	S.Martín-Bravo & C. Benítez-Benítez, 14SMB16	UPOS herbarium 8757
Carex reuteriana ssp. mauritanica	Spain	Málaga, La Sauceda	36.56	-5.57	P. Jiménez-Mejías & I. Pulgar	UPOS herbarium
Carex reuteriana ssp. mauritanica	Spain	Huelva, San Telmo	37.79	-6.97	J. M. Marín & M. Luceño	UPOS herbarium
Carex reuteriana ssp. mauritanica	Spain	Huelva, Villarasa, Gadea bridge	37.423	-6.611	E. Sánchez Gullón & P.Weickert	UPOS herbarium 2674
Carex reuteriana ssp. mauritanica	Spain	Seville, Cascadas del Huéznar	37.994	-5.667		UPOS herbarium
Carex reuteriana ssp. mauritanica	Spain	Seville, Rivera de Huelva, between Cazalla de la Sierra and Constantina	37.937	-5.682		UPOS herbarium
Carex reuteriana ssp. mauritanica	Spain	Cádiz, Alcornocales Natural Park, La Montera del Torero	36.2231	-5.57528	S. Martín-Bravo & V. Valcárcel	UPOS herbarium 6838
Carex reuteriana ssp. mauritanica	Spain	Cádiz, Benaocaz, Tavizna river, Molino de la Angostura	36.7336	-5.47016	A. Aparicio & J.G. Rowe	SEV herbarium 201515
Carex reuteriana ssp. mauritanica	Spain	Cádiz, El Gastor, Guadalete river, Puerto la Asperilla	36.8521	-5.32742	A. Aparicio & J.G. Rowe	SEV herbarium 201501
Carex reuteriana ssp. mauritanica	Spain	Seville, Puebla de los Infantes, Retortillo dam	37.8407	-5.34964	P.Navas, M.A. Mateos & M.C. Domínguez	SEV herbarium 214720
Carex reuteriana ssp. mauritanica	Spain	Málaga, Júzcar, pr. de los Riscos	36.6187	-5.16956	D.Montilla	SEV herbarium 244772
Carex reuteriana ssp. mauritanica	Spain	Málaga, Ronda, El Duende	36.7401	-5.16741	D. Montilla	SEV herbarium 244773
Carex reuteriana ssp. mauritanica	Spain	Benaoján, Guadiaro river	36.7111	-5.24685	D. Montilla	SEV herbarium 244774
Carex reuteriana ssp. mauritanica	Spain	Huelva, Valverde del Camino, Fresnajoso stream	37.5672	-6.73869	C. Santa-Bárbara & B. Valdés	SEV herbarium 151221
Carex reuteriana ssp. mauritanica	Spain	Huelva, Rosal de la Frontera, rivera del Calaboza	37.9606	-7.21142	C. Santa-Bárbara & B. Valdés	SEV herbarium 151220
Carex reuteriana ssp. mauritanica	Spain	Córdoba, Santa María de Trassierra.Bridge of Guadiato river	37.9519	-4.96223	E. Domínguez & al.	SEV herbarium 11132
Carex reuteriana ssp. mauritanica	Spain	Cádiz, Tarifa, Cerro de los Morrones, Cabeza del Gallego	36.1624	-5.59906	J. Arroyo & J.M. Gil	SEV herbarium 76814
Carex reuteriana ssp. mauritanica	Spain	Córdoba, Villanueva del Rey, Los Molinos stream	38.2272	-5.12032	M. Arenas, E. Domínguez & al.	SEV herbarium 110560
Carex reuteriana ssp. mauritanica	Spain	Lora del río, Cortijo Mazuecos	37.6461	-5.51111	M. Barrera & al.	SEV herbarium 110558
Carex reuteriana ssp. mauritanica	Spain	Cádiz, Los Barrios, Cañas river	36.1818	-5.50038	D.M.C. Brinton-Lee	SEV herbarium 8204
Carex reuteriana ssp. mauritanica	Spain	Seville, Villaverde del Río	37.5852	-5.86273	Morales & al.	SEV herbarium 110557
Carex reuteriana ssp. mauritanica	Spain	Cádiz, Algeciras, Sierra Luna	36.1115	-5.50221	B. Cabezudo, T. Luque & B. Valdés	SEV herbarium 110387
Carex reuteriana ssp. mauritanica	Spain	Cádiz. Tarifa, Sierra de Ojén	36.0981	-5.5605	S.Talavera & B. Valdés	SEV herbarium
Carex reuteriana ssp. mauritanica	Spain	Huelva, Sierra de Aracena, La Granada de río Tinto	37.7645	-6.51089	B. Cabezudo & B. Valdés	SEV herbarium
Carex reuteriana ssp. mauritanica	Spain	Huelva, Sierra de Aracena, between Alajar and Santa Ana la Real	37.8668	-6.70557	J. Rivera y B. Cabezudo	SEV herbarium
Carex reuteriana ssp. mauritanica	Spain	Grazalema, Caserío del Boyar	36.7471	-5.41891	A. Aparicio	SEV herbarium
Carex reuteriana ssp. mauritanica	Spain	Huelva, Sierra de Aracena, between Zufre and Santa Olalla del Cala, ribera de Huelva	37.7874	-6.26612	B. Cabezudo & B. Valdés	SEV herbarium 49935
Carex reuteriana ssp. mauritanica	Spain	Cádiz, Alcalá de los Gazules, Algeciras road, Parroso stream under Laguna de los Patos	36.3456	-5.61456	B. Cabezudo, F. García & J.G. Rowe	SEV herbarium
Carex reuteriana ssp. mauritanica	Spain	Córdoba, Alcolea del Río, crossing of Villanueva	37.624	-5.68908	Aparicio, García & Silvestre	SEV herbarium
Carex reuteriana ssp. mauritanica	Spain	Cádiz, between Los Barrios and Facinas	36.1674	-5.57694	B. Cabezudo, F. García & J. Rivera	SEV herbarium 110386
Carex reuteriana ssp. mauritanica	Spain	Huelva, El Talenque, between Aracena and Jabugo, Navahermosa	37.9333	-6.67686	P. Castro Prigent	SEV herbarium 282747
Carex reuteriana ssp. mauritanica	Spain	Huelva, Puebla de Guzmán, Chanza river	37.6065	-7.41224	C. Santa-Bárbara & B. Valdés	SEV herbarium 51219
Carex reuteriana ssp. mauritanica	Spain	Huelva, Almonaster La Real, rivera Escalada	37.8702	-6.75059	C. Santa-Bárbara & J.F. Santa-Bárbara	SEV herbarium 51217
Carex reuteriana ssp. mauritanica	Morocco	Chefchaouen, Oued Laou, near to a dam	35.3667	-5.16667	A.J.Caruz, M.A. Mateos & F.J. Pina	SEV herbarium 149164
Carex reuteriana ssp. mauritanica	Spain	Córdoba, Valle del Guadalmellato, cima Cerro del Lobo	37.4061	-4.20182	M. Arenas	COFC herbarium 7843
Carex reuteriana ssp. mauritanica	Spain	Córdoba, Cardeña, Coto Santa María, Zocorejo stream	38.2285	-4.24942	J. Muñóz & J. Quijada	COFC herbarium 7086
Carex reuteriana ssp. mauritanica	Spain	Huelva, Rivera de Montemayor, Cañaveral de León	38.0011	-6.49373	M. Morales	COFC herbarium 25745
Carex reuteriana ssp. mauritanica	Spain	Huelva, Stream of the King, Cortijo El Zafiño	37.7904	-6.37767	M. Morales & R. Tamajón	COFC herbarium 25947
Carex reuteriana ssp. mauritanica	Spain	Córdoba, Hornachuelos, Guadiato river, Huerta del Rey	37.838	-5.23657	R. Pinilla & R. Tamajón	COFC herbarium 22718
Carex reuteriana ssp. mauritanica	Spain	Jaén, Despeñaperros National Park, coto de las Tinajuelas	38.3671	-3.49688	R. Porras & A. Sánchez	COFC herbarium 28486
Carex reuteriana ssp. mauritanica	Spain	Córdoba, Villaviciosa de Córdoba, Guadiato river. Casa de Los Borres	37.9598	-4.94696	J. Varela	COFC herbarium 1703
Carex reuteriana ssp. mauritanica	Spain	Huelva, Rosal de la Frontera, rivera de Calaboza-rivera del Aserrador	37.9166	-7.21409	J. Muñóz & A.J. Sánchez	COFC herbarium 47986
Carex reuteriana ssp. mauritanica	Spain	Córdoba, Hornachuelos, Mesas del Arrendal, Laurel stream	37.8727	-5.01562	C. Lucena	COFC herbarium 49370
Carex reuteriana ssp. mauritanica	Spain	Córdoba, Guadiato river, bridge of Villaviciosa de Córdoba road	38.185	-5.05237	E. Domínguez & J. Varela	COFC herbarium 44821
Carex reuteriana ssp. mauritanica	Spain	Córdoba, Guadiato river, Cerro Castro and Picón	37.9466	-4.97129	E. Domínguez & al.	COFC herbarium 1702
Carex reuteriana ssp. mauritanica	Spain	Córdoba, Guadalora stream, Retortillo dam	37.8513	-5.39776	P. Fernández, I. Porras & J. Varela	COFC herbarium 14615
Carex panormitana	Italy	Sardinia, Bau Mela river, Villagrande	39.982	9.424	M. Urbani	SS herbarium
Carex panormitana	Italy	Sardinia, Olbia -Tempio, Terra Mala river, Berchidda	40.816	9.239	M. Urbani	SS herbarium
Carex panormitana	Italy	Sardinia, Olbia -Tempio, Miriacheddu river, Calangianus	40.889	9.264	M. Urbani	SS herbarium
Carex panormitana	Italy	Sardinia, Cantoniera, Pirae´onni, Villagrande	40.015	9.396	M. Urbani	SS herbarium
Carex panormitana	Italy	Sicily,Fiume Oreto, near Ponte delle Grazie	38.079	13.324	D. Cusimano	SS herbarium
Carex panormitana	Italy	Sicily, Palermo, Fiume Oreto, Ponte delle Grazie	38.079	13.321	D. Cusimano	SS herbarium
Carex panormitana	Italy	Sicily, Palermo, Fiume Oreto, Fontana Lupo	38066	13.297	D. Cusimano	SS herbarium
Carex panormitana	Italy	Sicily, Palermo, Fiume Oreto, Ponte Parco	38.067	13.3	D. Cusimano	SS herbarium
Carex panormitana	Italy	Sicily, Palermo, Fiume Oreto, via Villagrazia	38.085	13.334	D. Cusimano	SS herbarium
Carex panormitana	Italy	Sicily, Palermo, Fiume Oreto, Ponte Corleone	38.087	13.338	D. Cusimano	SS herbarium
Carex panormitana	Tunisia	El Feija National Park	36.487	8.309	P.Jiménez-Mejías & J.E. Rodríguez	UPOS herbarium 6636
Carex panormitana	Tunisia	Tabarka	37	9	J. Höller	M herbarium 223053
Carex panormitana	Italy	Sardinia, Olbia-Tempio, Oschiri	40.697	9.178	Urbani et al. 2013	Schede per una Lista Rossa della Flora vascolare Italiana
Carex panormitana	Italy	Sardinia, Olbia-Tempio, Tempio	40.903	9.081	Urbani et al. 2013	Schede per una Lista Rossa della Flora vascolare Italiana
Carex panormitana	Italy	Sardinia, Olbia-Tempio, Luras	40.948	9.149	Urbani et al. 2013	Schede per una Lista Rossa della Flora vascolare Italiana
Carex panormitana	Italy	Sardinia, Olbia-Tempio, Aglientu	41.172	9.175	Urbani et al. 2013	Schede per una Lista Rossa della Flora vascolare Italiana
Carex panormitana	Italy	Sardinia, Olbia-Tempio, Monti	40.741	9.366	Urbani et al. 2013	Schede per una Lista Rossa della Flora vascolare Italiana
Carex panormitana	Italy	Sardinia, Nuoro, Fonni	40.137	9.235	Urbani et al. 2013	Schede per una Lista Rossa della Flora vascolare Italiana
Carex panormitana	Italy	Sardinia, Nuoro, Arzana	39.907	9.49	Urbani et al. 2013	Schede per una Lista Rossa della Flora vascolare Italiana
Carex panormitana	Italy	Sardinia, Nuoro, Dorgali	40.223	9.615	Urbani et al. 2013	Schede per una Lista Rossa della Flora vascolare Italiana
Carex panormitana	Italy	Sardinia, Ogliastra, Villagrande Strisaili	39.967	9.506	Urbani et al. 2013	Schede per una Lista Rossa della Flora vascolare Italiana
Carex panormitana	Italy	Sardinia, Ogliastra, Baunei	40.033	9.679	Urbani et al. 2013	Schede per una Lista Rossa della Flora vascolare Italiana
Carex panormitana	Italy	Sardinia, Cagliari, Burcei	39.34	9.371	Urbani et al. 2013	Schede per una Lista Rossa della Flora vascolare Italiana
Carex panormitana	Italy	Sardinia, Cagliari, Sinnai	39.315	9.18	Urbani et al. 2013	Schede per una Lista Rossa della Flora vascolare Italiana
Carex panormitana	Italy	Sardinia, Cagliari, San Vito	39.442	9.554	Urbani et al. 2013	Schede per una Lista Rossa della Flora vascolare Italiana
Carex panormitana	Italy	Sardinia, Cagliari, Muravera	39.417	9.595	Urbani et al. 2013	Schede per una Lista Rossa della Flora vascolare Italiana
Carex panormitana	Italy	Sardinia, Cagliari, Escalaplano	39.624	9.311	Urbani et al. 2013	Schede per una Lista Rossa della Flora vascolare Italiana
Carex panormitana	Italy	Sardinia, Cagliari, San Priamo	39.355	9.554	Urbani et al. 2013	Schede per una Lista Rossa della Flora vascolare Italiana
Carex panormitana	Italy	Sardinia, Sassari, Scala di Giocca	40.703	8.607	Urbani et al. 2013	Schede per una Lista Rossa della Flora vascolare Italiana
Carex panormitana-type	Italy	Ca´Viettone, Turin, Piedmont	45.05	7.514		Bertoldi & Martinetto (1995)
Carex panormitana-type	Germany	Trebs borehole, Hagenow District, Southwest-Mecklenburg	53.41	11.174		Von Büloow & Mai (1992), Mai (2004)
Carex panormitana-type	Italy	Castelletto Cervo I, Biella, Piedmont	45.516	8.225		Carvallo & Martinetto (2001)
Carex panormitana-type	Italy	Ceresole d´Alba, Piedmont	44.8	7.818		Ciangherotti et al. (2007)
Carex panormitana-type	Italy	W Piedmont (Levone, Nole Canavese)	45.318	7.603		Jiménez-Mejías & Martinetto (2013)
Carex panormitana-type	Germany	Rippersroda, Thuringia	50.757	10.875		Mai et al. (1963), Mai & Walther (1988)
Carex panormitana-type	Germany	Kranichfeld, Thuringia	50.856	11.197		Mai (1965), Mai & Walther (1988)
Carex panormitana-type	Italy	RDB Quarry-Villafranca d´Asti, Piedmont	44.91	8.036		Mai (1995), Jiménez-Mejías & Martinetto (2013)
Carex panormitana-type	Germany	Kaltensundheim, Thuringia	50.601	10.151		Mai & Walther (1988)
Carex panormitana-type	Germany	Nordhausen, Thuringia	51.5	10.76		Mai & Walther (1988), Jiménez-Mejías et al. (2016)
Carex panormitana-type	Italy	Barbania and La Cassa, Piedmont	45.305	7.583		Martinetto (1994a), Jiménez-Mejías & Martinetto (2013)
Carex panormitana-type	Italy	Dunarobba, Umbria	42.67	12.452		Martinetto (1994a), Martinetto et al. (2007), Jiménez-Mejías & Martinetto (2013)
Carex panormitana-type	Italy	Stura di Lanzo River Fossil Forest, Piedmont	45.204	7.498		Martinetto (1994a), Jiménez-Mejías & Martinetto (2013), Martinetto et al (2014b)
Carex panormitana-type	Italy	Roatti, Piedmont	44.847	10.46		Martinetto & Mai (1996)
Carex panormitana-type	Poland	Kroscienko	49.455	20.387		Szafer (1938, 1947), Jiménez-Mejías et al. (2016)
Carex panormitana-type	Poland	Mizerna, Czorsztyn	49.459	20.29		Szafer (1954), Jiménez-Mejías et al. (2016)
Carex panormitana-type	Germany	Görsbach, Thuringia	51.46	10.941		Jiménez-Mejías et al. (2016)
Carex panormitana-type	Netherlands	Öebel, Tegelen	51.344	6.134		Jiménez-Mejías et al. (2016)
